# Supplementary material
Source: publisher figshare collection journal article supplement (https://frontiersin.figshare.com/ndownloader/files/22796525)
Supplement: Supplementary file 1 [file 22796525]

## Sheet: Review data
paper number	Reference label	Region	Reference	Publication year	Country	General location	Study category 1	Study category 2	Study category 3	Accuracy of the study site's location (0-3)	Lat_dec	Long_dec	Min. depth (m)	Max. depth (m)	Min. water temperature οC (month)	Max. water temperature οC (month)	Min. Salinity (ppt)	Max. Salinity (ppt)	Sediment properties	Growth rates (cm/day)	Leaf production (mg/day)	Leaf length (mm)	Leaf width (mm)	Internode length (mm)	Leaf area (mm2)	Number of leaves per plant	Shoot density (shoot/m2)	Meadow size (m2)	Percentage cover (%)	Total biomass (DW g/m2)	Belowground biomass (DW g/m2)	Aboveground biomass (DW g/m2)	Aboveground/Belowground biomass ratio	Sexual reproduction frequency	Reproductive season	Notes
1	A1*	Arabian Gulf	Phillips, 2002	2002	United Arab Emirates	Abu Dhabi Islands	Distribution	Ecology		1	24.4694	54.3484	5	5															Few, with Halodule, H. ovalis
1	A1*	Arabian Gulf	Phillips, 2002	2002	United Arab Emirates	Dohat An Nakhla	Distribution	Ecology		1	24.2467	51.6992																	Occasionally vast
1	A1*	Arabian Gulf	Phillips, 2002	2002	United Arab Emirates	Jebel Dahnna	Distribution	Ecology		1	24.1349	52.6197	6	6															Solid vast
1	A1*	Arabian Gulf	Phillips, 2002	2002	United Arab Emirates	Marawah Island	Distribution	Ecology		1	24.3002	53.2886	2.5	9															Few, with Halodule, H. ovalis
2	A2	Arabian Gulf	Price & Coles, 1992	1992	Saudi Arabia	western Arabian Gulf coast	Ecology	Biomass	Pollution	3	27.335	49.2333	2	2	18.0 (February)	18.0 (February)	50	50										100 - 999
2	A2	Arabian Gulf	Price & Coles, 1992	1992	Saudi Arabia	western Arabian Gulf coast	Ecology	Biomass	Pollution	3	27.275	49.4983	1	1	20.0 (February)	20.0 (February)	45	45										100 - 999
2	A2	Arabian Gulf	Price & Coles, 1992	1992	Saudi Arabia	western Arabian Gulf coast	Ecology	Biomass	Pollution	3	26.8833	50.1333	5	5	18.7 (February)	18.7 (February)	56	56
2	A2	Arabian Gulf	Price & Coles, 1992	1992	Saudi Arabia	western Arabian Gulf coast	Ecology	Biomass	Pollution	3	26.1367	49.9983	5	5	17.0 (January)	17.0 (January)	57	57										100 - 999
2	A2	Arabian Gulf	Price & Coles, 1992	1992	Saudi Arabia	western Arabian Gulf coast	Ecology	Biomass	Pollution	3	26.8167	50.3167	14.5	14.5	22.0 (April)	22.0 (April)	57	57
2	A2	Arabian Gulf	Price & Coles, 1992	1992	Saudi Arabia	western Arabian Gulf coast	Ecology	Biomass	Pollution	3	25.6367	50.2133	3	3	18.0 (February)	18.0 (February)	58	58										1000 - 9999
2	A2	Arabian Gulf	Price & Coles, 1992	1992	Saudi Arabia	western Arabian Gulf coast	Ecology	Biomass	Pollution	3	26.1	50.25			22.0 (April)	22.0 (April)	55	55
2	A2	Arabian Gulf	Price & Coles, 1992	1992	Saudi Arabia	western Arabian Gulf coast	Ecology	Biomass	Pollution	3	28.0283	48.6667	2	2	21.5 (February)	21.5 (February)	42	42										100 - 999
2	A2	Arabian Gulf	Price & Coles, 1992	1992	Saudi Arabia	western Arabian Gulf coast	Ecology	Biomass	Pollution	3	25.2	50.55	10	10	18.0 (February)	18.0 (February)	57	57
2	A2	Arabian Gulf	Price & Coles, 1992	1992	Saudi Arabia	western Arabian Gulf coast	Ecology	Biomass	Pollution	3	25.0383	50.565	4	4	19.0 (February)	19.0 (February)	58	58										10 - 99
2	A2	Arabian Gulf	Price & Coles, 1992	1992	Saudi Arabia	western Arabian Gulf coast	Ecology	Biomass	Pollution	3	27.6833	49.9167	5.5	5.5			41	41
2	A2	Arabian Gulf	Price & Coles, 1992	1992	Saudi Arabia	western Arabian Gulf coast	Ecology	Biomass	Pollution	3	27.75	48.7983	4	4	18.5 (February)	18.5 (February)	44	44										100 - 999
3	A3*	Arabian Gulf	Naser, 2014	2014	Bahrain	Bahrain	Distribution	Ecology	Conservation & Management	1	26.06	50.5562			31	31	70	70	Sandy and Muddy
3	A3*	Arabian Gulf	Naser, 2014	2014	Qatar	Qatar	Distribution	Ecology	Conservation & Management	1	25.3567	51.1838			31	31	70	70	Sandy and Muddy
4	A4	Arabian Gulf	Campbell et al., 2015	2015	United Arab Emirates	Abu al Abyab, Abu Dhabi	Ecology	Carbon metabolism		3	24.2051	53.6159			28.3	28.3	46.3	46.3
4	A4	Arabian Gulf	Campbell et al., 2015	2015	United Arab Emirates	Bu Tinah, Abu Dhabi	Ecology	Carbon metabolism		3	24.5785	53.079			27.4	27.4	43.6	43.6
4	A4	Arabian Gulf	Campbell et al., 2015	2015	United Arab Emirates	Bu Tinah, Abu Dhabi	Ecology	Carbon metabolism		3	24.5485	53.04			27.4	27.4	43.4	43.4
4	A4	Arabian Gulf	Campbell et al., 2015	2015	United Arab Emirates	Dahwat an Nahklah, Abu Dhabi	Ecology	Carbon metabolism		3	24.2478	51.6935			25.3	25.3	46.6	46.6
4	A4	Arabian Gulf	Campbell et al., 2015	2015	United Arab Emirates	Fasht al Basm, Abu Dhabi	Ecology	Carbon metabolism		3	24.2408	53.4742			28.1	28.1	44.8	44.8
4	A4	Arabian Gulf	Campbell et al., 2015	2015	United Arab Emirates	Halat Idai, Abu Dhabi	Ecology	Carbon metabolism		3	24.199	52.453			25.4	25.4	45.1	45.1
4	A4	Arabian Gulf	Campbell et al., 2015	2015	United Arab Emirates	Jazirat, Abu Dhabi	Ecology	Carbon metabolism		3	24.1513	52.0476			25.4	25.4	45.4	45.4
4	A4	Arabian Gulf	Campbell et al., 2015	2015	United Arab Emirates	Marawah, Abu Dhabi	Ecology	Carbon metabolism		3	24.277	53.3483			26.8	26.8	44.9	44.9
4	A4	Arabian Gulf	Campbell et al., 2015	2015	United Arab Emirates	Ras Muhayjij, Abu Dhabi	Ecology	Carbon metabolism		3	24.2528	51.6676
4	A4	Arabian Gulf	Campbell et al., 2015	2015	United Arab Emirates	Sila peninsula, Abu Dhabi	Ecology	Carbon metabolism		3	24.2326	51.7996			25.4	25.4	45.3	45.3
4	A4	Arabian Gulf	Campbell et al., 2015	2015	United Arab Emirates	Umm Al Hatam, Abu Dhabi	Ecology	Carbon metabolism		3	24.2115	51.8712			25.4	25.4	45.2	45.2
5	A5*	Arabian Gulf	Erftemeijer & Shuail, 2012	2012	United Arab Emirates	Arabian Gulf	Distribution	Ecology	dugong herbivory	1	nd	nd
6	A6	Arabian Gulf	Kenworthy et al., 1993	1993	Saudi Arabia	Dawhat ad Dafi mid bay	Ecology	Pollution		1	27.3635	49.4827	1.5	1.5	20.3 (march-April)	20.3 (march-April)	47.5	47.5									3286
6	A6	Arabian Gulf	Kenworthy et al., 1993	1993	Saudi Arabia	Dawhat al Musallamiya	Ecology	Pollution		1	27.4265	49.3164	1.5	2	19.0 (march-April)	19.0 (march-April)	46.5	46.5									3429
7	A7*	Arabian Gulf	Den Hartog, 1970	1970	Bahrain	Ras al Bar	Distribution				25.7906	50.5692
8	A8*	Arabian Gulf	Durako et al., 1993	1993	Saudi Arabia	Dawhat ad dafi	Links with humans	Physiology	Primary productivity	2	27.3635	49.4827	2	3
1	C1*	Caribbean Sea	Becking et al., 2014	2014	Caribbean Netherlands	Lac Bay East Coast, Bonaire	Ecology	Herbivory	Ecological adaptation	1	12.1667	-68.25	2	2
2	C2	Caribbean Sea	Bervoets, 2013	2013	St. Maarten	Simpson Bay Lagoon	Distribution	Ecology		3	18.0496	-63.1042										6.0-18.0	2.0-6.0	7.0-50.0
2	C2	Caribbean Sea	Bervoets, 2013	2013	St. Maarten	Simpson Bay Lagoon	Distribution	Ecology		3	18.0499	-63.1102										6.0-18.0	2.0-6.0	7.0-50.0
2	C2	Caribbean Sea	Bervoets, 2013	2013	St. Maarten	Simpson Bay Lagoon	Distribution	Ecology		3	18.0444	-63.0913										6.0-18.0	2.0-6.0	7.0-50.0
3	C3	Caribbean Sea	Chiquillo et al., 2018	2018	United States territory	Great Lameshur Bay, St. John, U.S. Virgin Islands (USVI)	Ecology	Sexual reproduction	Fruits & Flowers	3	18.3185	-64.7218	5	6					Sandy
4	C4*	Caribbean Sea	Debrot et al., 2011	2011	Caribbean Netherlands	Lac Bay, Bonaire	Distribution	Survey		1	12.1047	-68.2294																	Abundant
4	C4*	Caribbean Sea	Debrot et al., 2011	2011	St. Maarten	Simpson bay	Distribution	Survey		1	18.0382	-63.1164	5	5					Sandy										Abundant
5	C5*	Caribbean Sea	Debrot et al., 2012	2012	Caribbean Netherlands	Blue pool, Lac bay, Bonaire	Distribution	Ecology		1	12.1047	-68.2294	2.5	2.5	30.0 (september-december)	30.0 (september-december)	37.9	37.9	Silt										5.3							Expansion of Hs might therefore have severe effects on the Lac biotopes
6	C6*	Caribbean Sea	Maréchal et al., 2013	2013	French Caribbean	Fort de France, Martinique	Distribution	Survey		1	14.6161	-61.0588	3	32					Sandy
6	C6*	Caribbean Sea	Maréchal et al., 2013	2013	French Caribbean	Saint Pierre, Martinique	Distribution	Survey		1	14.7792	-61.1753	3	32					Sandy
6	C6	Caribbean Sea	Maréchal et al., 2013	2013	French Caribbean	Anse Madame, Fort de France, Martinique	Distribution	Survey		3	14.6272	-61.1053	11	11					Sandy									>1
7	C7*	Caribbean Sea	Rodgers et al., 2014	2014	United States territory	U.S. Virgin Island (USVI)	Distribution	Range expansion		1	18.3341	-64.8962
8	C8	Caribbean Sea	Ruiz & Ballantine, 2004	2004	Grenada	Flamingo Bay	Distribution	Ecology	Morphometrics	3	12.0918	-61.7574	3.6	3.6								48	8	20.0-22.0				300								H. stipulacea has locally displaced native seagrasses in Flamingo Bay
9	C9*	Caribbean Sea	Scheibling et al., 2018	2018	Grenada	Craigston Bay, Carriacou	Distribution	survey	Habitat	1	12.4793	-61.45	5	5															85.0-92.0
9	C9*	Caribbean Sea	Scheibling et al., 2018	2018	Grenada	Hillsborough Bay, Carriacou	Distribution	survey	Habitat	1	12.4566	-61.4844																	45.0-47.0	2419±150
9	C9*	Caribbean Sea	Scheibling et al., 2018	2018	Grenada	L'Esterre bay, Carriacou	Distribution	survey	Habitat	1	12.474	-61.4807																	29.0-32.0	4164±88
9	C9*	Caribbean Sea	Scheibling et al., 2018	2018	Grenada	Tyrell Bay, Carriacou	Distribution	survey	Habitat	1	12.4607	-61.4841																	90.0-95.0	4593±281
9	C9*	Caribbean Sea	Scheibling et al., 2018	2018	Grenada	Watering Bay, Carriacou	Distribution	survey	Habitat	1	12.4793	-61.45																		4869±358
9	C9	Caribbean Sea	Scheibling et al., 2018	2018	Grenada	Carriacou Coast	Distribution	survey	Habitat	2	12.8	-61.0667	1	5
10	C10	Caribbean Sea	Smulders et al., 2017	2017	Caribbean Netherlands	Lac Bay East Coast, Bonaire	Distribution	Range expansion	Fragmented settlement	2	12.1667	-68.25	0.3	6
11	C11*	Caribbean Sea	Steiner & Willette, 2015b	2015b	Dominica	Grande Savane	Ecology	Range expansion		1	15.4441	-61.4477	2	18
11	C11*	Caribbean Sea	Steiner & Willette, 2015b	2015b	Dominica	Mero	Ecology	Range expansion		1	15.4235	-61.4275	2	18
12	C12	Caribbean Sea	Steiner & Willette, 2013	2013	Dominica	Anse a Liane	Ecology	Survey	Pollution	3	15.4891	-61.4658	18	18														180
12	C12	Caribbean Sea	Steiner & Willette, 2013	2013	Dominica	Bioche	Ecology	Survey	Pollution	3	15.5082	-61.467	18	18														120
12	C12	Caribbean Sea	Steiner & Willette, 2013	2013	Dominica	Canefield	Ecology	Survey	Pollution	3	15.3347	-61.3938	18	18														110
12	C12	Caribbean Sea	Steiner & Willette, 2013	2013	Dominica	Colihaut (Anse Cola)	Ecology	Survey	Pollution	3	15.4804	-61.4606	18	18														110
12	C12	Caribbean Sea	Steiner & Willette, 2013	2013	Dominica	Douglas Bay	Ecology	Survey	Pollution	3	15.5911	-61.4656	12	12														120
12	C12	Caribbean Sea	Steiner & Willette, 2013	2013	Dominica	Espagnol Bay	Ecology	Survey	Pollution	3	15.5312	-61.4753	18	18														110
12	C12	Caribbean Sea	Steiner & Willette, 2013	2013	Dominica	Gueule Lion	Ecology	Survey	Pollution	3	15.4623	-61.4542	18	18														100
12	C12	Caribbean Sea	Steiner & Willette, 2013	2013	Dominica	Jimmit	Ecology	Survey	Pollution	3	15.3775	-61.4075	18	18														140
12	C12	Caribbean Sea	Steiner & Willette, 2013	2013	Dominica	Layou	Ecology	Survey	Pollution	3	15.4014	-61.4275	15	15														190
12	C12	Caribbean Sea	Steiner & Willette, 2013	2013	Dominica	Macoucheri	Ecology	Survey	Pollution	3	15.4303	-61.4373	5	7														300
12	C12	Caribbean Sea	Steiner & Willette, 2013	2013	Dominica	Mahaut	Ecology	Survey	Pollution	3	15.3639	-61.4003	18	18														160
12	C12	Caribbean Sea	Steiner & Willette, 2013	2013	Dominica	Mero Central	Ecology	Survey	Pollution	3	15.4179	-61.4312	8	15														440
12	C12	Caribbean Sea	Steiner & Willette, 2013	2013	Dominica	Mero North	Ecology	Survey	Pollution	3	15.4191	-61.4302	11	11														180
12	C12	Caribbean Sea	Steiner & Willette, 2013	2013	Dominica	Mero South	Ecology	Survey	Pollution	3	15.4159	-61.4294	6	15														280
12	C12	Caribbean Sea	Steiner & Willette, 2013	2013	Dominica	Pointe Michel	Ecology	Survey	Pollution	3	15.2596	-61.3776	18	18														120
12	C12	Caribbean Sea	Steiner & Willette, 2013	2013	Dominica	Prince Rupert Bay	Ecology	Survey	Pollution	3	15.5778	-61.4582	2	5														250
12	C12	Caribbean Sea	Steiner & Willette, 2013	2013	Dominica	Salisbury Bay	Ecology	Survey	Pollution	3	15.4325	-61.4363	19	19														80
12	C12	Caribbean Sea	Steiner & Willette, 2013	2013	Dominica	Salisbury Cliffs	Ecology	Survey	Pollution	3	15.4358	-61.441	6	15														85
12	C12	Caribbean Sea	Steiner & Willette, 2013	2013	Dominica	Scott’s Head	Ecology	Survey	Pollution	3	15.2131	-61.3688	1	7
12	C12	Caribbean Sea	Steiner & Willette, 2013	2013	Dominica	Toucari	Ecology	Survey	Pollution	3	15.6089	-61.4641	18	18														240
13	C13	Caribbean Sea	Steiner et al., 2010	2010	Dominica	Anse à Liane	Distribution	Survey		3	15.4889	-61.4662	18	18															> 1%
13	C13	Caribbean Sea	Steiner et al., 2010	2010	Dominica	Anse Mulâtre	Distribution	Survey		3	15.5037	-61.4678	18	18															> 1%
13	C13	Caribbean Sea	Steiner et al., 2010	2010	Dominica	Bioche	Distribution	Survey		3	15.5082	-61.4673	15	15															0.01
13	C13	Caribbean Sea	Steiner et al., 2010	2010	Dominica	Canefield	Distribution	Survey		3	15.3344	-61.3945	16	16															> 1%
13	C13	Caribbean Sea	Steiner et al., 2010	2010	Dominica	Colihaut (Anse Cola)	Distribution	Survey		3	15.4806	-61.4608	18	18															< 1%
13	C13	Caribbean Sea	Steiner et al., 2010	2010	Dominica	Dublanc	Distribution	Survey		3	15.5161	-61.4705	18	18															0.01
13	C13	Caribbean Sea	Steiner et al., 2010	2010	Dominica	Espagnol Bay	Distribution	Survey		3	15.5311	-61.4753	16	16															> 1%
13	C13	Caribbean Sea	Steiner et al., 2010	2010	Dominica	Geule Leon	Distribution	Survey		3	15.4622	-61.4542	18	18															0.01
13	C13	Caribbean Sea	Steiner et al., 2010	2010	Dominica	Layou (North)	Distribution	Survey		3	15.4017	-61.428	15	15															0.01
13	C13	Caribbean Sea	Steiner et al., 2010	2010	Dominica	Toucari	Distribution	Survey		3	15.6093	-61.4645	15	15															> 1%
14	C14	Caribbean Sea	van Tussenbroek et al., 2016a	2016a	Caribbean Netherlands	Lac Bay, Bonaire	Links with humans	Ecology	Eutrophication	3	12.0936	-68.235	0.3	0.5															Sparse
14	C14	Caribbean Sea	van Tussenbroek et al., 2016a	2016a	Caribbean Netherlands	Lac Bay, Bonaire	Links with humans	Ecology	Eutrophication	3	12.0936	-68.235	0.3	0.5															Sparse
14	C14	Caribbean Sea	van Tussenbroek et al., 2016a	2016a	Caribbean Netherlands	Lac Bay, Bonaire	Links with humans	Ecology	Eutrophication	3	12.1056	-68.2225	2.5	2.5															Dense
14	C14	Caribbean Sea	van Tussenbroek et al., 2016a	2016a	Caribbean Netherlands	Lac Bay, Bonaire	Links with humans	Ecology	Eutrophication	3	12.1056	-68.2225	0.5	1															Dense
14	C14	Caribbean Sea	van Tussenbroek et al., 2016a	2016a	St. Maarten	Baie L'Embouchure	Links with humans	Ecology	Eutrophication	3	18.0719	-63.0175	2	3															Dense
14	C14	Caribbean Sea	van Tussenbroek et al., 2016a	2016a	St. Maarten	Oyster Point	Links with humans	Ecology	Eutrophication	3	18.0533	-63.0158	0.2	0.3															Sparse
14	C14	Caribbean Sea	van Tussenbroek et al., 2016a	2016a	St. Maarten	Pinel	Links with humans	Ecology	Eutrophication	3	18.1067	-63.0172	2	2															Sparse
14	C14	Caribbean Sea	van Tussenbroek et al., 2016a	2016a	St. Maarten	Pinel	Links with humans	Ecology	Eutrophication	3	18.1033	-63.02	1.5	1.5															Sparse
14	C14	Caribbean Sea	van Tussenbroek et al., 2016a	2016a	St. Maarten	Pinel	Links with humans	Ecology	Eutrophication	3	18.1033	-63.0225	2	2.5															Dense
14	C14	Caribbean Sea	van Tussenbroek et al., 2016a	2016a	St. Maarten	Simpson bay	Links with humans	Ecology	Eutrophication	3	18.0464	-63.0978	1	1															Dense
15	C15	Caribbean Sea	Vera et al., 2014	2014	Venezuela	Puerto Azúl Bay	Distribution	Range expansion	Invasive species	3	10.62	-66.7392	2	30
16	C16*	Caribbean Sea	Willette & Ambrose, 2009	2009	St. Lucia	Anse La Raye	Distribution	Range expansion		1	13.946	-61.037	12	12
16	C16*	Caribbean Sea	Willette & Ambrose, 2009	2009	St. Lucia	Labrelotte Bay	Distribution	Range expansion		1	14.0568	-60.974	3	3
16	C16	Caribbean Sea	Willette & Ambrose, 2009	2009	Dominica	Douglas Bay	Distribution	Range expansion		3	15.5992	-61.4656	7	18														37500
16	C16	Caribbean Sea	Willette & Ambrose, 2009	2009	Dominica	Lamothie Bay	Distribution	Range expansion		3	15.6189	-61.4666	7	18
16	C16	Caribbean Sea	Willette & Ambrose, 2009	2009	Dominica	Pointe Ronde	Distribution	Range expansion		3	15.5394	-61.4816	15	15											4
16	C16	Caribbean Sea	Willette & Ambrose, 2009	2009	Dominica	Prince Rupert Bay	Distribution	Range expansion		3	15.583	-61.4674	5	18
16	C16	Caribbean Sea	Willette & Ambrose, 2009	2009	Dominica	Pringles Bay	Distribution	Range expansion		3	15.3267	-61.3965	7	7											120
16	C16	Caribbean Sea	Willette & Ambrose, 2009	2009	Dominica	Ti Bay	Distribution	Range expansion		3	15.5472	-61.4729	10	10											80
16	C16	Caribbean Sea	Willette & Ambrose, 2009	2009	Dominica	Toucari Bay	Distribution	Range expansion		3	15.6089	-61.4644	2	18											36
16	C16	Caribbean Sea	Willette & Ambrose, 2009	2009	St. Lucia	Marigot Bay	Distribution	Range expansion		1	13.9663	-61.0275	1	1
17	C17	Caribbean Sea	Willette & Ambrose, 2012	2012	Dominica	Prince Rupert Bay	Ecology	Associated fish community & Epibiota community		2	15.5667	-61.4667
18	C18	Caribbean Sea	Willette et al., 2014	2014	Caribbean Netherlands	Jenkins Bay, St Eustatius	Distribution	Range expansion		2	17.5	-63	16	26					Sandy										Common
18	C18	Caribbean Sea	Willette et al., 2014	2014	Caribbean Netherlands	Lac Bay, Bonaire	Distribution	Range expansion		2	12.0833	-68.2333	< 1.0	5					Sandy										Abundant
18	C18	Caribbean Sea	Willette et al., 2014	2014	Caribbean Netherlands	San Nicolas, Aruba	Distribution	Range expansion		2	12.45	-69.9167	10	10					Sandy										Abundant
18	C18	Caribbean Sea	Willette et al., 2014	2014	Caribbean Netherlands	St Joris Bay, Curacao	Distribution	Range expansion		2	12.1167	-68.8	2	2					Sandy										Abundant
18	C18	Caribbean Sea	Willette et al., 2014	2014	Dominica	Lamothe Bay	Distribution	Range expansion		2	15.6167	-61.45	7	18					Sandy										Common
18	C18	Caribbean Sea	Willette et al., 2014	2014	French Caribbean	Anse du petit Malendure, Guadalupe	Distribution	Range expansion		2	16.1667	-61.7667							Sandy
18	C18	Caribbean Sea	Willette et al., 2014	2014	French Caribbean	Fort-de-France Bay, Martinique	Distribution	Range expansion		2	14.6	-61.0833	30	30					Sandy										Abundant
18	C18	Caribbean Sea	Willette et al., 2014	2014	French Caribbean	Terre-de-Haunt, Les Saintes, Guadalupe	Distribution	Range expansion		2	15.85	-61.6167	7	15					Sandy										Common
18	C18	Caribbean Sea	Willette et al., 2014	2014	Grenada	Flamingo Bay	Distribution	Range expansion		2	12.0833	-61.75	4	4					Sandy										Rare
18	C18	Caribbean Sea	Willette et al., 2014	2014	Grenada	Sandy Island, Carriacou	Distribution	Range expansion		2	12.4667	-61.45	1	4					Sandy										Common
18	C18	Caribbean Sea	Willette et al., 2014	2014	St. Lucia	Marigot Bay	Distribution	Range expansion		2	13.95	-61.0167	1	1					Sandy										Rare
18	C18	Caribbean Sea	Willette et al., 2014	2014	St. Vincent	Admiralty Bay, Bequia	Distribution	Range expansion		2	13	-61.2333	1	8					Sandy										Abundant
18	C18	Caribbean Sea	Willette et al., 2014	2014	St. Vincent	Petit St. Vincent	Distribution	Range expansion		2	12.5167	-61.3667	4	8					Sandy										Abundant
18	C18	Caribbean Sea	Willette et al., 2014	2014	St. Vincent	Richmond Bay, Union Is	Distribution	Range expansion		2	12.6	-61.4333	1	3					Sandy										Common
18	C18	Caribbean Sea	Willette et al., 2014	2014	St. Vincent	Salt Whistle Bay, Mayreau	Distribution	Range expansion		2	12.6333	-61.3833	3	4					Sandy										Common
18	C18	Caribbean Sea	Willette et al., 2014	2014	St. Vincent	Tobago Cays	Distribution	Range expansion		2	12.6333	-61.35	3	5					Sandy										Rare
18	C18	Caribbean Sea	Willette et al., 2014	2014	St. Vincent	Villa, Indian Bay	Distribution	Range expansion		2	13.1333	-61.2	3	6					Sandy										Abundant							H. stipulacea does compete with the native Caribbean seagrass S. filiforme for space and has empirically been shown to alter the abundance and composition of seagrass-associated organisms and the local seagrass community
18	C18	Caribbean Sea	Willette et al., 2014	2014	St. Maarten	B. Cul-de-Sac	Distribution	Range expansion		2	18.1	-63.0167	3	3					Sandy										Rare
18	C18	Caribbean Sea	Willette et al., 2014	2014	St. Maarten	Simpson Bay	Distribution	Range expansion		2	18.0167	-63.0833	5	5					Sandy										Abundant
18	C18	Caribbean Sea	Willette et al., 2014	2014	United States territory	Mennebeck Reef, St. John, U.S. Virgin Islands	Distribution	Range expansion		2	18.35	-64.6833	16	16					Sandy										Abundant
19	C19	Caribbean Sea	Ferry et al., 2017	2017	French Caribbean	Anse d’Arlet, Martinique	Ecology	Habitat	Associated animal community	3	14.4892	-61.081	2	15
19	C19	Caribbean Sea	Ferry et al., 2017	2017	French Caribbean	Anse Dufour, Martinique	Ecology	Habitat	Associated animal community	3	14.5258	-61.0896	2	15
19	C19	Caribbean Sea	Ferry et al., 2017	2017	French Caribbean	Anse Mitan, Martinique	Ecology	Habitat	Associated animal community	3	14.5514	-61.0545	2	15
19	C19	Caribbean Sea	Ferry et al., 2017	2017	French Caribbean	Anse Noire, Martinique	Ecology	Habitat	Associated animal community	3	14.5276	-61.0873	2	15
19	C19	Caribbean Sea	Ferry et al., 2017	2017	French Caribbean	Grande Anse d’Arlet, Martinique	Ecology	Habitat	Associated animal community	3	14.503	-61.0857	2	15
20	C20	Caribbean Sea	Olinger et al., 2017	2017	United States territory	Brewers Bay, U.S. Virgin Island	Ecology	Associated fish community		3	18.3437	-64.9779																	100
20	C20	Caribbean Sea	Olinger et al., 2017	2017	United States territory	Frenchman Bay, U.S. Virgin Island	Ecology	Associated fish community		3	18.3142	-64.9076																	100
20	C20	Caribbean Sea	Olinger et al., 2017	2017	United States territory	Lindbergh Bay, U.S. Virgin Islands	Ecology	Associated fish community		3	18.335	-64.9686																	83
20	C20	Caribbean Sea	Olinger et al., 2017	2017	United States territory	Sprat Bay, U.S. Virgin Islands	Ecology	Associated fish community		3	18.3206	-64.9444																	100
21	C21*	Caribbean Sea	Ruiz et al., 2017	2017	British Caribbean	The British Virgin Islands (BVI)	Distribution	Range expansion		1	18.4099	-64.6452
21	C21*	Caribbean Sea	Ruiz et al., 2017	2017	United States territory	Puerto Rico	Distribution	Range expansion		1	17.95	-66.586
22	C22*	Caribbean Sea	Steiner & Willete, 2015a	2015a	Dominica	Dominica	Distribution	Range expansion		1	15.4083	-61.3726
23	C23*	Caribbean Sea	Christianen et al.,2019	2019	Caribbean Netherlands	Lac Bay East Coast, Bonaire	Ecology	Herbivory	Ecological adaptation	1	12.1667	-68.25	2	2
1	I1	Indian Ocean	Aleem, 1984	1984	Kenya	Mombasa Harbour	Distribution	Ecology		2	-4	30			29.0 (november-december)	30.0 (november-december)			Sand and Muddy
2	I2	Indian Ocean	Arumugam et al., 2010	2010	India	Mandapam Coast	Other	Bioprospecting	Antimicrobial activity	3	9.29028	79.1426																								Seagrass extracts and pathogens in petri dishes
3	I3*	Indian Ocean	Beer & Björk, 2000	2000	Tanzania	West Coast Zanzibar	Physiology	Photosynthesis	PAM fluorometry	1	-6.15209	39.1899
4	I4*	Indian Ocean	Coppejans et al., 1992	1992	Kenya	Gazi Bay	Distribution			1	-4.43692	39.5179			25.5 (july-august)	42.0 (july-august)	24	56	Sandy and Muddy
5	I5	Indian Ocean	De Troch et al., 2003	2003	Kenya	Gazi Bay	Ecology	Distribution	Habitat	2	-4.36667	39.5					35	35	Sandy										10.0-100.0
6	I6	Indian Ocean	De la Torre-Castro & Ronnback, 2004	2004	Tanzania	Chwaka Bay, East Coast Zanzibar	Links with humans	Ecosystem services		2	-6.22083	39.6263	3.2	3.2
7	I7	Indian Ocean	De Troch et al., 2001b	2001b	Kenya	Gazi Bay	Ecology	Distribution	Habitat	2	-4.36667	39.5					35	35											10.0-100.0
8	I8	Indian Ocean	De Troch et al., 2001a	2001a	Kenya	Gazi Bay	Ecology	Distribution	Habitat	2	-4.36667	39.5					35	35	Sandy										10.0-100.0
9	I9	Indian Ocean	Jagtap, 1991	1991	India	Kanyakumari, Tamil Nadu Coast	Distribution	Diversity		2	7	78	2	6					Sandy
9	I9	Indian Ocean	Jagtap, 1991	1991	India	Kilkarai, Tamil Nadu Coast	Distribution	Diversity		2	8	79	2	6					Sandy
9	I9	Indian Ocean	Jagtap, 1991	1991	India	Minicoy, Lakshadweep	Distribution	Diversity		2	8	74	2	6
9	I9*	Indian Ocean	Jagtap, 1991	1991	India	Pamban, Tamil Nadu Coast	Distribution	Diversity		1	9.26635	79.2091	2	6					Sandy
10	I10	Indian Ocean	Kamermans et al., 2002	2002	Kenya	Kenyatta	Links with humans	Pollution	Survey	2	-4	40	1.5	1.5			34.5	34.5	Sandy and Slit										0.5
10	I10	Indian Ocean	Kamermans et al., 2002	2002	Tanzania	Dongwe, Zanzibar island	Links with humans	Pollution	Survey	2	-7	39	1.5	1.5			38.3	38.3	Sandy										2.3
10	I10	Indian Ocean	Kamermans et al., 2002	2002	Tanzania	Kiwengwa, Zanzibar island	Links with humans	Pollution	Survey	2	-6	39	1.5	1.5			36.4	36.4	Sandy										0.3
10	I10	Indian Ocean	Kamermans et al., 2002	2002	Tanzania	Tumbatu, Zanzibar island	Links with humans	Pollution	Survey	2	-6	39	1.5	1.5			38.5	38.5	Sandy										0.2
11	I11	Indian Ocean	Kannan et al., 2010	2010	India	Mandapam coast	Other	Bioprospecting	Antimicrobial activity	3	9.29028	79.1426																								Seagrass extracts and pathogens in petri dishes
12	I12	Indian Ocean	Mahalingam & Gopinath, 1987	1987	India	Krusadai Island, Gulf of Mannar	Ecology	Conservation & Management		2	9	78.5			23	35	24	35
12	I12	Indian Ocean	Mahalingam & Gopinath, 1987	1987	India	Pamban Channel, Gulf of Mannar	Ecology	Conservation & Management		2	9	78.5			23	35	24	35
12	I12	Indian Ocean	Mahalingam & Gopinath, 1987	1987	India	Rameswaran Island, Gulf of Mannar	Ecology	Conservation & Management		2	9	78.5			23	35	24	35
13	I13	Indian Ocean	Marbà & Duarte, 1998	1998	Kenya	Kenya	Physiology	Morphometrics		0	nd	nd												16
14	I14	Indian Ocean	Marbà et al., 2002	2002	Kenya	Nyali Beach	Physiology	Carbon metabolism & Nitrogen fixation		2	-4.00167	39.7083								2.7	10.8			2.56
15	I15*	Indian Ocean	Marbà et al., 2006	2006	Kenya	Nyali Beach	Physiology	Carbon metabolism & Nitrogen fixation		1	-4.04816	39.71
16	I16	Indian Ocean	Mariani & Alcoverro, 1999	1999	Kenya	Watamu Marine National park	Ecology	Herbivory	Associated fish community	2	-3.36667	39.9833
17	I17*	Indian Ocean	McMillan, 1980	1980	Kenya	Diani Beach	Physiology	Sexual reproduction	Fruits & Flowers	1	-4.28009	39.595
18	I18*	Indian Ocean	McMillan, 1984	1984	Kenya	Diani Beach	Distribution	Physiology	Stress tolerance	1	-4.28009	39.595
19	I19	Indian Ocean	Milchakova et al., 2005	2005	Seychelles Islands	African Atoll	Distribution			2	-6	54	3	31
19	I19	Indian Ocean	Milchakova et al., 2005	2005	Seychelles Islands	St Joseph Island	Distribution			2	-5	53	3	37
20	I20	Indian Ocean	Nordlund et al., 2010	2010	Tanzania	Nungwi (exploited site), Unguja Island, Zanzibar island	Links with humans	Survey	Habitat	2	-5.71667	39.2833
20	I20	Indian Ocean	Nordlund et al., 2010	2010	Tanzania	Nungwi (remote site), Unguja Island, Zanzibar island	Links with humans	Survey	Habitat	2	-5.83333	39.3333
21	I21	Indian Ocean	Parthasaranthy et al., 1991	1991	India	Adhirampattinam	Distribution	Ecology	Survey	2	10.5	79	2	3																							Pistillate flowers and fruits were observed for Halophila stipulacea in February
21	I21	Indian Ocean	Parthasaranthy et al., 1991	1991	India	Krusadai Island	Distribution	Ecology	Survey	2	10.5	80	2	3
21	I21	Indian Ocean	Parthasaranthy et al., 1991	1991	India	Mallipattinam	Distribution	Ecology	Survey	2	10.5	81	2	3
21	I21	Indian Ocean	Parthasaranthy et al., 1991	1991	India	Manamelkudi	Distribution	Ecology	Survey	2	10.5	82	2	3
21	I21	Indian Ocean	Parthasaranthy et al., 1991	1991	India	Manora	Distribution	Ecology	Survey	2	10.5	83	2	3
21	I21	Indian Ocean	Parthasaranthy et al., 1991	1991	India	Mimisal	Distribution	Ecology	Survey	2	10.5	84	2	3
22	I22*	Indian Ocean	Pettitt, 1981	1981	kenya	Funzi Bay, Mombasa	Ecology	Sexual reproduction	Pollen morphogenesis	1	-4.56612	39.4399
23	I23*	Indian Ocean	Pettitt, 1980	1980	kenya	Funzi Bay, Mombasa	Ecology	Sexual reproduction	Pollen characteristics	1	-4.56612	39.4399
1	R1	Red sea	Abu-Hilal et al., 1988	1988	Jordan	Gulf of Aqaba	Links with humans	Pollution	Trace elements	2	29.5403	34.9781							Terrigenous, Fine sand, Muddy and Facies										90
1	R1	Red sea	Abu-Hilal et al., 1988	1988	Jordan	Gulf of Aqaba	Links with humans	Pollution	Trace elements	2	29.4586	34.9756							Terrigenous, Fine sand, Muddy and Facies										90
2	R2	Red sea	Aleem, 1979	1979	Saudi Arabia	Mugeirma	Distribution	Ecology	Survey	2	20.1714	40.2275	0.5	2	28	28	39	39	Muddy																	first record for the Saudi Coast
3	R3	Red sea	Aleem, 1980	1980	Egypt	Al Quantara, Suez Canal	Distribution	Survey		2	30.8672	32.3174																	Great quantities							Less robust than Mersa Matrouh
3	R3	Red sea	Aleem, 1980	1980	Egypt	Bitter Lake, Suez Canal	Distribution	Survey		2	30.2533	32.4691					47.5	47.5											Great quantities
3	R3	Red sea	Aleem, 1980	1980	Egypt	El Tina, Suez Canal	Distribution	Survey		2	31.0416	32.3085																	Great quantities							Because Red Sea current would also flow along the bottom of the Canal into the Mediterranean most of the year, even though the surface wind is in the opposite direction. It explains the preponderance of species of Red Sea origin in the Eastern Mediterranean.
4	R4*	Red sea	Angel et al., 1995	1995	Israel	North Beach, Eilat, Gulf of Aqaba	Physiology	Ecology	Nitrogen fixation	1	29.5461	34.9647	5	6	21	26			Fine sand and Silt	0.17-0.30	0.015-0.034				80-520
4	R4*	Red sea	Angel et al., 1995	1995	Israel	North Beach, Eilat, Gulf of Aqaba	Physiology	Ecology	Nitrogen fixation	1	29.5431	34.9731	5	6	21	26			Sandy	0.18-0.27	0.015-0.034				80-520
4	R4*	Red sea	Angel et al., 1995	1995	Israel	Tur Yam, Eilat, Gulf of Aqaba	Physiology	Ecology	Nitrogen fixation	1	29.5164	34.9269	5	6	21	26			Coral rubble and Sandy	0.16-0.27	0.015-0.034				80-520
5	R5	Red sea	Anton et al., 2018	2018	Saudi Arabia	Central Red Sea, station S11	Physiology	Photosynthesis & Biochemical analyses	Iron deficiency	3	22.934	38.88	1.5	1.5	27.9 (february-april)	27.9 (february-april)	41.3	41.3
5	R5	Red sea	Anton et al., 2018	2018	Saudi Arabia	Northern Red Sea, station S1	Physiology	Photosynthesis & Biochemical analyses	Iron deficiency	3	27.969	35.201	8	8	22.6 (february-april)	22.6 (february-april)	40.65	40.65
5	R5	Red sea	Anton et al., 2018	2018	Saudi Arabia	Northern Red Sea, station S3	Physiology	Photosynthesis & Biochemical analyses	Iron deficiency	3	25.702	36.569	4	4	23.9 (february-april)	23.9 (february-april)	40.53	40.53
5	R5	Red sea	Anton et al., 2018	2018	Saudi Arabia	Southern Red Sea, station S7	Physiology	Photosynthesis & Biochemical analyses	Iron deficiency	3	19.682	40.645	0.5	0.5	29.5 (february-april)	29.5 (february-april)	38.86	38.86
6	R6	Red sea	A-Rousan et al., 2011	2011	Jordan	Hotel area in Gulf of Aqaba (north)	Distribution	Biomass	Morphometrics	2	29.54	34.95	2	18															20.0-30.0
6	R6	Red sea	A-Rousan et al., 2011	2011	Jordan	Phosphate Loading Berth in Gulf of Aqaba (north)	Distribution	Biomass	Morphometrics	2	29.52	34.97	2	18															20.0-30.0
6	R6	Red sea	A-Rousan et al., 2011	2011	Jordan	Tala Bay, Gulf of Aqaba	Distribution	Biomass	Morphometrics	2	29.41	34.96	2	18															20.0-30.0
7	R7*	Red sea	Baydoun & Brett, 1985	1985	Jordan	Gulf of Aqaba	Physiology	Biochemical analyses	Cell wall biochemical composition	1	29.4582	34.9753
8	R8	Red sea	Beca-Carretero et al., 2019	2019	Israel	Gulf of Aqaba	Physiology	Biochemical analyses	Fatty acids	3	29.497	34.911	6	21	25	26.5						11.0-13.0
8	R8	Red sea	Beca-Carretero et al., 2019	2019	Israel	Gulf of Aqaba	Physiology	Biochemical analyses	Fatty acids	3	29.5	34.915	6	21	25	26.5						11.5-14-0
9	R9*	Red sea	Beer & Waisel, 1982	1982	Israel	Gulf of Aqaba	Physiology	Photosynthesis		1	nd	nd	0.5	10
10	R10	Red sea	Beer et al., 1977	1977	Israel	Gulf of Aqaba	Physiology	Photosynthesis & Carbon metabolism	Carbon uptake	2	28.2167	34.4333	1	3
11	R11	Red sea	Beer et al., 1998	1998	Jordan	Gulf of Aqaba	Physiology	Photosynthesis	PAM fluorometry	2	31.5833	34.9	6	6
12	R12*	Red sea	Beer et al., 2002	2002	Israel	Northern Red Sea	Physiology	Photosynthesis & Carbon metabolism	Carbon uptake	1	nd	nd
13	R13	Red sea	Cardini et al., 2018	2018	Jordan	Gulf of Aqaba	Physiology	Nitrogen fixation & Photosynthesis		3	29.4577	34.9712	5	30
14	R14*	Red sea	Doddema & Howari, 1983	1983	Jordan	seagrass beds opposite the Aqaba Marine Science Station, Gulf of Aqaba	Physiology	Nitrogen fixation		1	29.4587	34.974	1	1
15	R15	Red sea	Drew, 1979	1979	Egypt	Sinai	Physiology	Photosynthesis		2	35.85	14.5	2	18
17	R17*	Red sea	Fox, 1926	1926	Egypt	K0, Little bitter Lake, Kabret point, Suez Canal	Distribution	Ecology		1	30.2585	32.5033
17	R17*	Red sea	Fox, 1926	1926	Egypt	K1, Little bitter Lake, Kabret point, Suez Canal	Distribution	Ecology		1	30.2608	32.487	1	3					Sandy and Muddy
17	R17*	Red sea	Fox, 1926	1926	Egypt	K12, Little bitter Lake, Kabret point, Suez Canal	Distribution	Ecology		1	30.2655	32.5071	1	2					Sandy and Muddy
17	R17*	Red sea	Fox, 1926	1926	Egypt	Km 76, Lake Timsah, Suez Canal	Distribution	Ecology		1	30.5902	32.3095							Stones, Sandy and Muddy
17	R17*	Red sea	Fox, 1926	1926	Egypt	PT.4, Port taufiq, Suez Canal	Distribution	Ecology		1	29.9371	32.5708							Sandy and Muddy
17	R17*	Red sea	Fox, 1926	1926	Egypt	R.8, Port taufiq, Suez Canal	Distribution	Ecology		1	29.93	32.55	2.5	2.5					Muddy
17	R17*	Red sea	Fox, 1926	1926	Egypt	T.14, Lake Timsah, Suez Canal	Distribution	Ecology		1	30.5527	32.2913							Sandy
18	R18	Red sea	Gab-Alla, 2001	2001	Egypt	Sharm El-Moyia Bay	Ecology	Pollution	Links with humans	3	27.8581	34.2956	2	2	23.0 (April)	27.0 (April)	40	44	Sandy								4800 ±200		96.0-100.0	270 ±30
18	R18	Red sea	Gab-Alla, 2001	2001	Egypt	Sharm El-Moyia Bay	Ecology	Pollution	Links with humans	3	27.8594	34.2992	1.5	1.5	24.0 (April)	28.0 (April)	42	44	Sandy								1000 ±40		9.0-12.0	25 ±3
18	R18	Red sea	Gab-Alla, 2001	2001	Egypt	Sharm El-Moyia Bay	Ecology	Pollution	Links with humans	3	27.8572	34.2994	1.5	1.5	23.0 (April)	27.0 (April)	42	44	Sandy								1200 ±100		10.0-20.0	27 ±3
18	R18	Red sea	Gab-Alla, 2001	2001	Egypt	Sharm El-Moyia Bay	Ecology	Pollution	Links with humans	3	27.8583	34.2944	1.5	1.5	25.0 (April)	27.0 (April)	40	44	Sandy								5000 ±300		100	280 ±30
18	R18	Red sea	Gab-Alla, 2001	2001	Egypt	Sharm El-Moyia Bay	Ecology	Pollution	Links with humans	3	27.8586	34.2922	2	2	25.0 (April)	27.0 (April)	42	44	Sandy								4500 ±100		80.0-90.0	260 ±25
18	R18	Red sea	Gab-Alla, 2001	2001	Egypt	Sharm El-Moyia Bay	Ecology	Pollution	Links with humans	3	27.8603	34.2914	2.5	2.5	22.0 (April)	26.0 (April)	42	44	Sandy								4500 ±100		75.0-85.0
18	R18	Red sea	Gab-Alla, 2001	2001	Egypt	Sharm El-Moyia Bay	Ecology	Pollution	Links with humans	3	27.8619	34.2986	1	1	25.0 (April)	27.0 (April)	42	44	Sandy								1000 ±50		8.0-12.0	30 ±5
19	R19	Red sea	Hulings & Kirkman, 1982	1982	Jordan	Gulf of Aqaba	Distribution	Ecology	Morphometrics	2	34.9167	29.2	47	47
19	R19	Red sea	Hulings & Kirkman, 1982	1982	Jordan	Gulf of Aqaba	Distribution	Ecology	Morphometrics	1	29.4393	34.9666	47	47
19	R19*	Red sea	Hulings & Kirkman, 1982	1982	Jordan	Gulf of Aqaba	Distribution	Ecology	Morphometrics	1	29.4069	34.9683	47	47
19	R19*	Red sea	Hulings & Kirkman, 1982	1982	Jordan	Gulf of Aqaba	Distribution	Ecology	Morphometrics	2	29.4333	39.9667	47	47
19	R19*	Red sea	Hulings & Kirkman, 1982	1982	Jordan	Gulf of Aqaba	Distribution	Ecology	Morphometrics	1	29.4187	34.9699	47	47
19	R19*	Red sea	Hulings & Kirkman, 1982	1982	Jordan	Gulf of Aqaba	Distribution	Ecology	Morphometrics	1	29.4289	34.9686	47	47
19	R19*	Red sea	Hulings & Kirkman, 1982	1982	Saudi Arabia	Gulf of Aqaba	Distribution	Ecology	Morphometrics	1	29.2065	34.9103	37	37
20	R20*	Red sea	Hulings, 1979	1979	Jordan	Gulf of Aqaba	Ecology	Morphometrics		1	29.5172	34.9862	1	50
20	R20*	Red sea	Hulings, 1979	1979	Jordan	Gulf of Aqaba	Ecology	Morphometrics		1	29.4531	34.9666	1	50
20	R20*	Red sea	Hulings, 1979	1979	Jordan	Gulf of Aqaba	Ecology	Morphometrics		1	29.4041	34.9642	1	50
20	R20*	Red sea	Hulings, 1979	1979	Jordan	Gulf of Aqaba	Ecology	Morphometrics		1	29.3629	34.9552	1	50
21	R21*	Red sea	Jacobs & Dicks, 1985	1985	Egypt	Gha'b Ashrafi Island	Distribution	Ecology		1	27.7875	33.6846	1	1	29.0 (October)	29.0 (October)
21	R21*	Red sea	Jacobs & Dicks, 1985	1985	Egypt	Main land near Ghanim, Station T7	Distribution	Ecology		1	27.7811	33.6058	7	9	29.0 (October)	29.0 (October)
21	R21*	Red sea	Jacobs & Dicks, 1985	1985	Egypt	Mainland near Ras el-Bahar, T1	Distribution	Ecology		1	27.7556	33.5596	2	7	29.0 (October)	29.0 (October)																				only occasionally accompanied by Other species such as Turbinaria, Halodule univervis, H. ovalis (SG) and Caulerpa (Algae)
21	R21*	Red sea	Jacobs & Dicks, 1985	1985	Egypt	Mainland near Ras el-Bahar, T2	Distribution	Ecology		1	27.7467	33.5554	2	7	29.0 (October)	29.0 (October)
21	R21*	Red sea	Jacobs & Dicks, 1985	1985	Egypt	Mainland, T11	Distribution	Ecology		1	27.7024	33.5469			29.0 (October)	29.0 (October)
21	R21*	Red sea	Jacobs & Dicks, 1985	1985	Egypt	Northern shore Zeit Bay, T4	Distribution	Ecology		1	27.8109	33.5429	6	7	29.0 (October)	29.0 (October)													80.0 - 90.0
21	R21*	Red sea	Jacobs & Dicks, 1985	1985	Egypt	Ras Gharib	Distribution	Ecology		1	28.3681	33.0842			29.0 (October)	29.0 (October)
21	R21*	Red sea	Jacobs & Dicks, 1985	1985	Egypt	South Qeisum Island, T14	Distribution	Ecology		1	27.707	33.7336			29.0 (October)	29.0 (October)
21	R21*	Red sea	Jacobs & Dicks, 1985	1985	Egypt	South Zeit Bay, T5	Distribution	Ecology		1	27.7568	33.543	6	7	29.0 (October)	29.0 (October)													80.0 - 90.0
21	R21*	Red sea	Jacobs & Dicks, 1985	1985	Egypt	Zeit Bay (Ghubbel el-Zeit), Global survey	Distribution	Ecology		1	27.7982	33.5202	2	7	29.0 (October)	29.0 (October)			Sand fine, Muddy and Coarse-grained sand										80.0 - 90.0
22	R22	Red sea	Merkado et al., 2013	2013	Israel	Tur Yam, Eilat, Gulf of Aqaba	Other	Molecular studies		3	29.5173	34.9265	5	5
23	R23	Red sea	Khalaf et al., 2012	2012	Jordan	Hotel area in Gulf of Aqaba (north)	Ecology	Associated fish community		2	29.5333	34.9667	6	12
23	R23	Red sea	Khalaf et al., 2012	2012	Jordan	Phosphate Loading Berth in Gulf of Aqaba (north)	Ecology	Associated fish community		2	29.4667	34.9833	6	12
23	R23	Red sea	Khalaf et al., 2012	2012	Jordan	Tala Bay, Gulf of Aqaba	Ecology	Associated fish community		2	29.4	34.95	6	12
24	R24*	Red sea	Lipkin, 1975d	1975d	Egypt	Dahab, central Gulf of Aqaba	Ecology	Herbivory	Dugong stomach content	1	28.5102	34.5205
24	R24*	Red sea	Lipkin, 1975d	1975d	Egypt	Marsa el Muqeibila, northern Gulf of araba	Ecology	Herbivory	Dugong stomach content	1	29.4726	34.8642
25	R25*	Red sea	Lipkin, 1975c	1975c	Israel	Taba, Gulf of Aqaba	Ecology	Sexual reproduction	Fruits & Flowers	1	nd	nd	20	20
25	R25*	Red sea	Lipkin, 1975c	1975c	Israel	Taba, Gulf of Aqaba	Ecology	Sexual reproduction	Fruits & Flowers	1	nd	nd	23	23
26	R26*	Red sea	Lipkin, 1979	1979	Egypt	Marsa Abu Zabad, Egypt	Ecology	Morphometrics		1	28.1508	34.4485	0.5	30								40	5		360		14500			350	280	120				Leaf: (20 m) from 30 x5 mm to 120x10 mm
26	R26*	Red sea	Lipkin, 1979	1979	Egypt	Ras el Burqa, Egypt	Ecology	Morphometrics		1	29.2144	34.7386	0.5	30																						Below 10 m, there is only pure H.stipulacea communities.
27	R27	Red sea	Malm, 2006	2006	Israel	Gulf of Aqaba	Ecology	Sexual reproduction		3	28.1508	34.4485	2	15	21.0 (february)	27.0 (august)	41	41	Sand fine															Male/female depend on depth	May - August	With different depth, we have variaty of ratio male and female, proportion reproduction, and germination. Optimal 2 - 5 m. (0 - 2, sunlight inhibit germination)
28	R28	Red sea	Mass et al., 2010	2010	Israel	Gulf of Aqaba	Physiology	Photosynthesis	Oxygen flow	2	29.2144	34.7386	2	15																						Oxygen flow and photosynthetic ability
29	R29	Red sea	Mejia et al., 2016	2016	Israel	North Beach, Gulf of Aqaba	Ecology	Microbial Ecology, Morphometrics & Biochemical analyses	Seagrass monitoring	3	29.5462	34.9648	9	9	24.0 (October)	24.0 (October)	40.7	40.7	Fine sand			42.7 ± 7.8	13.5 ± 4.2		302.4 ± 61.7	20.8 ± 11.1
29	R29	Red sea	Mejia et al., 2016	2016	Israel	South Beach, Gulf of Aqaba	Ecology	Microbial Ecology, Morphometrics & Biochemical analyses	Seagrass monitoring	3	29.4977	34.9127	9	9	24.0 (October)	24.0 (October)	40.7	40.7	Gravel			35.2 ± 8.7	9.6 ± 3.1		183.5 ± 63.1	12.6 ± 4.2									July-August
29	R29	Red sea	Mejia et al., 2016	2016	Israel	Tur Yam, Gulf of Aqaba	Ecology	Microbial Ecology, Morphometrics & Biochemical analyses	Seagrass monitoring	3	29.5165	34.9272	9	9	24.0 (October)	24.0 (October)	40.7	40.7	Coarse medium sand			39.4 ± 8.5	11.6 ±3.8		227.9 ± 76.8	14.8 ± 10.0									July-August
30	R30	Red sea	Oron et al., 2014	2014	Israel	Gulf of Aqaba	Ecology	Habitat	Links with humans	3	29.5408	34.9733
31	R31*	Red sea	Osama et al., 2010	2010	Egypt	Abo Mokar east, Hurghada area	Distribution	Ecology		1	27.2167	33.8878	0.5	5															75
31	R31*	Red sea	Osama et al., 2010	2010	Egypt	Abo Monkar north, Hurghada area	Distribution	Ecology		1	27.2213	33.8719	2	4															70.0-75.0
31	R31*	Red sea	Osama et al., 2010	2010	Egypt	Abo Monkar west, Hurghada area	Distribution	Ecology		1	27.2042	33.8545	0.5	2															75.0-85.0
31	R31*	Red sea	Osama et al., 2010	2010	Egypt	El-Dahar, Hurghada area	Distribution	Ecology		1	27.2625	33.8671	0.5	3															70.0-80.0
31	R31*	Red sea	Osama et al., 2010	2010	Egypt	El-Fanous, Hurghada area	Distribution	Ecology		1	27.2677	33.887	0.5	7															70.0-80.0
31	R31*	Red sea	Osama et al., 2010	2010	Egypt	El-Nasraniah bay, Hurghada area	Distribution	Ecology		1	27.2145	33.8545	1	4															75.0-85.0
31	R31*	Red sea	Osama et al., 2010	2010	Egypt	Marine station, Hurghada area	Distribution	Ecology		1	27.2837	33.7726	3	10															75
31	R31*	Red sea	Osama et al., 2010	2010	Egypt	North Ahyaa, Hurghada area	Distribution	Ecology		1	27.3202	33.7124	3	15															80
31	R31*	Red sea	Osama et al., 2010	2010	Egypt	North Gifton, Hurghada area	Distribution	Ecology		1	27.2616	33.8987	2	2.5															50.0-60.0
31	R31*	Red sea	Osama et al., 2010	2010	Egypt	South Gifton, Hurghada area	Distribution	Ecology		1	27.1764	33.9497	4	6															60.0-70.0
31	R31*	Red sea	Osama et al., 2010	2010	Egypt	South Hurghada, Hurghada area	Distribution	Ecology		1	27.086	33.8608	0.5	2.5															50
32	R32*	Red sea	Pereg et al., 1994	1994	Israel	Gulf of Aqaba, 1.5 km south of the IUI	Ecology	Physiology	Nitrogen fixation	1	29.4905	34.9053	6	13
33	R33*	Red sea	Pereg-Gerk et al., 2002	2002	Israel	Gulf of Aqaba	Ecology	Physiology	Nitrogen fixation	1	29.5474	34.9565	6	12
34	R34	Red sea	Qurban et al., 2019	2019	Saudi Arabia	Central Red Sea, near Umluj, station 22	Distribution	Ecology	Morphometrics	3	25.1579	37.1627	3.5	3.5
34	R34	Red sea	Qurban et al., 2019	2019	Saudi Arabia	Central Red Sea, north of Jeddah, station 11	Distribution	Ecology	Morphometrics	3	22.9336	38.8803	2	2
34	R34	Red sea	Qurban et al., 2019	2019	Saudi Arabia	Central Red Sea, north of Jeddah, station 16	Distribution	Ecology	Morphometrics	3	22.9104	38.8698	0.5	0.5
34	R34	Red sea	Qurban et al., 2019	2019	Saudi Arabia	Northern Red Sea, near Duba, station 28	Distribution	Ecology	Morphometrics	3	27.2639	35.7583	4	4
34	R34	Red sea	Qurban et al., 2019	2019	Saudi Arabia	Northern Red Sea, near Sharmah, station 19	Distribution	Ecology	Morphometrics	3	28.0717	34.8457	1	1
34	R34	Red sea	Qurban et al., 2019	2019	Saudi Arabia	Northern Red Sea, near Sharmah, station 20	Distribution	Ecology	Morphometrics	3	26.9175	36.0076	1	1
34	R34	Red sea	Qurban et al., 2019	2019	Saudi Arabia	Southern Red Sea, near Baha, station 10	Distribution	Ecology	Morphometrics	3	19.9602	40.1549	0.5	1.5
34	R34	Red sea	Qurban et al., 2019	2019	Saudi Arabia	Southern Red Sea, near Baha, station 7	Distribution	Ecology	Morphometrics	3	19.613	40.6447	0.5	0.5
34	R34	Red sea	Qurban et al., 2019	2019	Saudi Arabia	Northern Red Sea, station 1	Distribution	Ecology	Morphometrics	3	27.9694	35.201	8	8
34	R34	Red sea	Qurban et al., 2019	2019	Saudi Arabia	Central Red Sea, station 31	Distribution	Ecology	Morphometrics	3	22.2487	39.0716	2.5	2.6
34	R34	Red sea	Qurban et al., 2019	2019	Saudi Arabia	Central Red Sea, station 4	Distribution	Ecology	Morphometrics	3	25.704	36.5681	4	4
35	R35	Red sea	Rotini et al., 2017	2017	Israel	Gulf of Aqaba	Ecology	Microbial Ecology, Morphometrics & Biochemical analyses		3	29.4977	34.9127	4	28	24.0 (october)	24.0 (october)	40.7	40.7				29.9 ± 6.6	7.7 ± 1.7		150.8 ± 48.7				28.0 ± 7.2
36	R36*	Red sea	Ruggiero & Procaccini, 2004	2004	Egypt	Ras Mohammed	Other	Genetic studies	Intragenomic variability	1	27.7388	34.2247
36	R36*	Red sea	Ruggiero & Procaccini, 2004	2004	Egypt	Small Creek	Other	Genetic studies	Intragenomic variability	1	27.7525	34.258
37	R37	Red sea	Runcie et al., 2009	2009	Israel	Gulf of Aqaba	Physiology	Photosynthesis	Photosynthetic rates	2	29.5	34.9167	8	33
38	R38	Red sea	Schwarz & Hellblom, 2002	2002	Israel	Gulf of Aqaba	Physiology	Photosynthesis	Photosynthetic rates & Morphometrics	2	29.8333	35.5333	7	30	21	26						29.9 ± 0.9		10.6 ± 0.9									2.5 ± 0.3			Shelter and nutrient availability are important determinants for retention of extensive beds of H. stipulacea over time.
39	R39	Red sea	Sharon & Beer, 2008	2008	Israel	Gulf of Aqaba	Physiology	Photosynthesis & Chloroplast clumping	PAM fluorometry	3	29.5003	34.9158	7	40	21.0 (february-march)	21.0 (february-march)																				Clumping of chloroplast for adapt with high irradiation with shallow water.
40	R40	Red sea	Sharon et al., 2009	2009	Israel	Gulf of Aqaba	Physiology	Photosynthesis	Photoacclimation	2	29.5	34.9	8	33
41	R41	Red sea	Sharon et al., 2011a	2011a	Israel	Gulf of Aqaba	Physiology	Photosynthesis & Chloroplast clumping	UV radiation	2	29.5	34.9167	1	48																						200 m south of the IUI
42	R42	Red sea	Sharon et al., 2011b	2011b	Israel	Gulf of Aqaba	Physiology	Photosynthesis	Photoacclimation	2	29.5	34.9167	0	50
43	R43*	Red sea	Wahbeh & Mahasneh, 1984	1984	Jordan	seagrass bed near the Marine Science Station in Aqaba	Links with humans	Pollution	Trace elements	1	29.4583	34.9755	5	5
44	R44*	Red sea	Wahbeh & Mahasneh, 1985	1985	Jordan	seagrass bed near the Marine Science Station in Aqaba	Ecology	Microbial Ecology	Descomposition	1	29.4583	34.9755																								Actinomyces, Arthrobacter, Bacillus and Pseudomonas, all of which are capable of degrading structural carbohydrates.
45	R45	Red sea	Wahbeh, 1988	1988	Jordan	Gulf of Aqaba	Distribution	Nutritive value	Morphometrics	1	nd	nd	0.2	0.2
46	R46*	Red sea	Wahbeh, 1984	1984	Jordan	seagrass bed near the Marine Science Station in Aqaba	Ecology	Morphometrics	Seagrass monitoring	1	29.4585	34.9757	10	10						1.12	3.51															optimal depth for growth: 3 m - winter, 5 m - summer
47	R47*	Red sea	Waldron et al., 1989	1989	Jordan	Gulf of Aqaba	Physiology	Biochemical analyses	Cell wall biochemical composition	1	nd	nd
48	R48*	Red sea	Weidner et al., 1996	1996	Israel	Gulf of Aqaba	Ecology	Microbial Ecology		1	29.4923	34.9562	6	13
49	R49*	Red sea	Weidner et al., 2000	2000	Israel	Gulf of Aqaba	Ecology	Microbial Ecology		1	29.4923	34.9562
50	R50	Red sea	Winters et al., 2017	2017	Israel	Northern Gulf of Aqaba	Distribution	Survey	Conservation & Management	3	38	19.4	2	53														343000	60.0 - 100.0
51	R51	Red sea	Nguyen et al., 2018	2018	Israel	Northern Gulf of Aqaba	Ecology	Sexual reproduction	Fruits & Flowers	3	29.58	34.9592	3	4
52	R52	Red sea	Apostolaki et al., 2019	2019	Israel	North Beach, Gulf of Aqaba	Ecology	Carbon metabolism		3	29.5461	34.9647	9	9
52	R52	Red sea	Apostolaki et al., 2019	2019	Israel	South Beach, Gulf of Aqaba	Ecology	Carbon metabolism		3	29.4975	34.9125	9	9
53	R53*	Red sea	Gargiulo et al., 2018	2018	Israel	Eilat, Gulf of Aqaba	Other	Genetic studies		1	nd	nd	3	9
54	R54	Red sea	Oscar et al., 2018	2018	Israel	North Beach, Gulf of Aqaba	Physiology	Photophysiology	Salinity stress tolerance	3	29.5462	34.9648	6	9											12.50-18.55						0.034	0.018
1	M1	Mediterranean	Alexandre et al., 2014	2014	Cyprus	Akrotiri Bay, Limassol	Physiology	Nutrients uptake	Nitrogen fixation	3	34.7061	33.1239	3	3
2	M2	Mediterranean	Acunto et al., 1995	1995	Italy	Vulcano Island, Sicily	Distribution	Survey		3	38.4156	14.9633	3	27
2	M2	Mediterranean	Acunto et al., 1995	1995	Italy	Vulcano Island, Sicily	Distribution	Survey		3	38.4136	14.9633	3	27
3	M3*	Mediterranean	Akçali & Cirik, 2007	2007	Turkey	southern Aegean Sea, Cesme, Dikali ili coasts.	Distribution	Range expansion		1	38.3264	26.269
4	M4	Mediterranean	Ateş et al., 2008	2008	Turkey	Samandağ coast, Hatay	Ecology	Habitat		3	36.0233	35.9758	25	25																						110 species epiphytes, Chondria pygmaea is proof "go with H. stipulacea from Red Sea to Mediterrance
5	M5*	Mediterranean	Bitam et al., 2010	2010	Greece	Porto Germeno coasts, Gulf of Corinth	Other	Bioprospecting		1	38.1537	23.2212	5	10
6	M6	Mediterranean	Bitar et al., 2017	2017	Lebanon	Aramane	Distribution	Survey		3	34.4803	35.9094	1	40
6	M6	Mediterranean	Bitar et al., 2017	2017	Lebanon	Barbara	Distribution	Survey		3	34.1978	35.6322	1	40
6	M6	Mediterranean	Bitar et al., 2017	2017	Lebanon	Batroun	Distribution	Survey		3	34.2664	35.6531	1	40
6	M6	Mediterranean	Bitar et al., 2017	2017	Lebanon	El Heri	Distribution	Survey		3	34.3097	35.7094	2	2
6	M6	Mediterranean	Bitar et al., 2017	2017	Lebanon	Enfeh	Distribution	Survey		3	34.3708	35.7303	1	40
6	M6	Mediterranean	Bitar et al., 2017	2017	Lebanon	Saida	Distribution	Survey		3	33.5622	35.3628	1	40
6	M6	Mediterranean	Bitar et al., 2017	2017	Lebanon	Selaata	Distribution	Survey		3	34.2692	35.6494	1	40
6	M6	Mediterranean	Bitar et al., 2017	2017	Lebanon	Zouk Mkayel	Distribution	Survey		3	33.9789	35.6042	1	40
7	M7	Mediterranean	Boudouresque et al., 2009	2009	nd	nd	Links with humans	Ecology		0	nd	nd
8	M8	Mediterranean	Boudouresque & Verlaque, 2002	2002	nd	nd	Ecology	Distribution		0	nd	nd	0	0
9	M9*	Mediterranean	Calvo et al., 2010	2010	Italy	Sicily	Distribution	Ecology	Survey	1	37.6	14.0154	1	1
10	M10*	Mediterranean	Cancemi et al., 1994	1994	Italy	Naxos-Taormina, Sicily	Ecology	Morphometrics	Habitat	1	37.8358	15.2808	2	2										17			19728
11	M11*	Mediterranean	Carbone et al., 2008	2008	Greece	Porto Germeno, Corinthian Gul	Other	Bioprospecting		1	38.1545	23.2234	12	12
12	M12*	Mediterranean	Cassaza & Mazzella, 2002	2002	Italy	Levante Bay of Vulcano Islands, Eolian Islands, Sicily	Physiology	Biochemistry		1	38.4728	14.9583	3	27
13	M13*	Mediterranean	Gavagnin et al., 2007	2007	Greece	Porto Germeno, Corinthian Gulf	Other	Bioprospecting		1	38.1545	23.2234	12	12
14	M14	Mediterranean	Tsirika & Haritonidis, 2005	2005	Greece	Agios Sostis harbour	Distribution	Survey		3	37.7144	20.8647							Soft bottom										Restricted dense meadow
15	M15*	Mediterranean	Den Hartog, 1972	1972	Malta	Marsaxlokk harbour	Distribution	Range expansion		0	36.8403	14.5456
15	M15*	Mediterranean	Den Hartog, 1972	1972	Cyprus	Famagusta, inner harbor, near Nisitou Jieri	Distribution	Range expansion		0	35.1365	33.94
15	M15*	Mediterranean	Den Hartog, 1972	1972	Greece	Lindos, Paulus Bay, Rhodes	Distribution	Range expansion		1	36.087	28.0882	2
16	M16	Mediterranean	Di Martino et al., 2006	2006	Italy	Capo Meli, Sicily	Ecology	Habitat		3	37.0039	15.3139	21	21	17.4 (october)	17.4 (october)	37.8	37.8	Muddy, thick dead mat of P. oceanica									50
16	M16	Mediterranean	Di Martino et al., 2006	2006	Italy	Capo Meli, Sicily	Ecology	Habitat		3	37.0039	15.3139			13.9 (january)	13.9 (january)	38	38	Muddy, thick dead mat of P. oceanica
16	M16	Mediterranean	Di Martino et al., 2006	2006	Italy	Capo Meli, Sicily	Ecology	Habitat		3	37.0039	15.3139			15.5 (april)	15.5 (april)	38	38	Muddy, thick dead mat of P. oceanica
16	M16	Mediterranean	Di Martino et al., 2006	2006	Italy	Capo Meli, Sicily	Ecology	Habitat		3	37.0039	15.3139			20.0 (july)	20.0 (july)	38.1	38.1	Muddy, thick dead mat of P. oceanica
17	M17	Mediterranean	Di Martino et al., 2007	2007	Italy	South East Peninsula Maddalena, Sicily	Ecology	Habitat	Associated fish community	3	37.0039	15.3139	21	21	13.9	20	38	38
17	M17	Mediterranean	Di Martino et al., 2007	2007	Italy	South East Peninsula Maddalena, Sicily	Ecology	Habitat	Associated fish community	3	37.0039	15.3139	21	21
17	M17	Mediterranean	Di Martino et al., 2007	2007	Italy	South East Peninsula Maddalena, Sicily	Ecology	Habitat	Associated fish community	3	37.0039	15.3139	21	21
18	M18*	Mediterranean	Di Martino et al., 2000	2000	Italy	Capo Meli,Syracuse, Sicily	Ecology	Habitat		1	37.0682	15.3012																								Qualitative minimal area of a macroalgal community associated with Halophila stipulacea from south-eastern Sicilian coast (Ionian Sea)
19	M19	Mediterranean	Drew, 1979	1979	Malta	Malta	Physiology	Photosynthesis	Photosynthetic rates	2	35.85	14.5	0.5	0.5
20	M20	Mediterranean	Evagelopoulos et al., 2015	2015	Greece	Sigri Bay, NE Aegean Sea	Distribution	Survey		2	39.2167	25.8333
21	M21*	Mediterranean	Missaoui et al., 2003	2003	Tunisia	Gulf of Gabes	Distribution			1	34.0214	10.3861
22	M22	Mediterranean	Gambi et al., 2009	2009	Italy	Palinuro harbor	Distribution	Ecology	Range expansion	3	40.028	15.2789	2	2								33.3 ± 4.3	4.4 ±0.7				10500 ± 2700							22.2 ± 7.5		A qualitative sample was also taken at 2 m depth in a patch where larger shoots of Halophila stipulacea were observed to vertically overgrow living Posidonia oceanica shoots.
23	M23	Mediterranean	Georgiou et al., 2016	2016	Cyprus	Akrotiri Bay	Distribution	Physiology	Range expansion	3	34.7061	33.1239	3	3	20.0 (january)	20.0 (january)	39	39		0.35 – 0.50																a large thermal tolerance from 10 to 30oC
24	M24	Mediterranean	Gerakaris & Tsiamis, 2015	2015	Greece	Chios Island	Ecology	Sexual reproduction	Fruits & Flowers	3	38.2939	25.9393	2	5
25	M25*	Mediterranean	Haritonidis & Tsekos, 1976	1976	Greece	Methoni Greek Coast	Distribution	Ecology	Survey	1	36.8157	21.7071	2.5	2.5
26	M26	Mediterranean	El-Hady et al., 2012	2012	Egypt	Boughaz II	Other	Molecular studies, Antimicrobial act. & Antioxidant act.		3	31.2042	33.2781	0.5	2
26	M26	Mediterranean	El-Hady et al., 2012	2012	Egypt	El-Rodh	Other	Molecular studies, Antimicrobial act. & Antioxidant act.		3	31.0994	33.2508	0.5	2
26	M26	Mediterranean	El-Hady et al., 2012	2012	Egypt	El-Telol	Other	Molecular studies, Antimicrobial act. & Antioxidant act.		3	31.0769	33.2267	0.5	2																						Antioxidant of H.stipulacea extracts
26	M26	Mediterranean	El-Hady et al., 2012	2012	Egypt	El-Zaranik	Other	Molecular studies, Antimicrobial act. & Antioxidant act.		3	31.1175	33.2808	0.5	2
26	M26	Mediterranean	El-Hady et al., 2012	2012	Egypt	M. El-Telol	Other	Molecular studies, Antimicrobial act. & Antioxidant act.		3	31.1431	33.2611	0.5	2
27	M27	Mediterranean	Katsanevakis, 2011	2011	Greece	Paros and Antiparos Island	Ecology	Range expansion		2	36.995	25.134	0	10
27	M27	Mediterranean	Katsanevakis, 2011	2011	Greece	Paros and Antiparos Island	Ecology	Range expansion		2	37.033	25.259	0	10
27	M27	Mediterranean	Katsanevakis, 2011	2011	Greece	Paros and Antiparos Island	Ecology	Range expansion		2	37.142	25.232	0	10
27	M27	Mediterranean	Katsanevakis, 2011	2011	Greece	Paros and Antiparos Island	Ecology	Range expansion		2	37.092	25.149	0	10
27	M27	Mediterranean	Katsanevakis, 2011	2011	Greece	Paros and Antiparos Island	Ecology	Range expansion		2	37.058	25.107	0	10
27	M27	Mediterranean	Katsanevakis, 2011	2011	Greece	Paros and Antiparos Island	Ecology	Range expansion		2	36.976	25.022	0	10
28	M28	Mediterranean	Katsanevakis & Tsiamis, 2009	2009	Greece	Chios Island	Ecology	Distribution		2	38.4167	26	0	10					Sandy
29	M29	Mediterranean	Lipkin, 1975a	1975a	Cyprus	Famagusta Bay	Distribution	Ecology	20	3	35.1417	33.925	18	18
29	M29	Mediterranean	Lipkin, 1975a	1975a	Cyprus	Famagusta Bay	Distribution	Ecology		3	35.1417	33.925	35	45
29	M29	Mediterranean	Lipkin, 1975a	1975a	Cyprus	Northeast of Koma-tou-Yialou	Distribution	Ecology		2	35.4167	34.15	28	64
29	M29	Mediterranean	Lipkin, 1975a	1975a	Cyprus	South of Cape Zevgari	Distribution	Ecology		3	34.5467	32.9383	27	27
29	M29	Mediterranean	Lipkin, 1975a	1975a	Cyprus	Akrotiri Bay	Distribution	Ecology		3	34.6583	33.0417	22	22																				female and fruit		flower and fruit were found September, 1967. Later than Red sea.
29	M29	Mediterranean	Lipkin, 1975a	1975a	Cyprus	Akrotiri Bay	Distribution	Ecology		3	34.6	33.0222	40	45
29	M29	Mediterranean	Lipkin, 1975a	1975a	Cyprus	East of Salamis	Distribution	Ecology		3	35.1836	33.9189	45	45
29	M29	Mediterranean	Lipkin, 1975a	1975a	Cyprus	Famagusta Bay	Distribution	Ecology		3	35.1417	33.925	37	37																						Mainly in vicinity of habour, depth 30 - 45 m
29	M29	Mediterranean	Lipkin, 1975a	1975a	Cyprus	Khrysokhou Bay	Distribution	Ecology		3	35.0522	32.4022	45	45
29	M29	Mediterranean	Lipkin, 1975a	1975a	Cyprus	Off Petounda Point	Distribution	Ecology		3	34.765	33.5017	13	18
29	M29	Mediterranean	Lipkin, 1975a	1975a	Cyprus	South of Akrotiri Peninsula	Distribution	Ecology		3	34.5361	32.9806	45	45
29	M29	Mediterranean	Lipkin, 1975a	1975a	Cyprus	Southeast of Limassol	Distribution	Ecology		3	34.6594	33.0617	45	45
29	M29	Mediterranean	Lipkin, 1975a	1975a	Cyprus	Southeast of Vasilikos	Distribution	Ecology		3	34.6667	33.375	45	45
29	M29*	Mediterranean	Lipkin, 1975a	1975a	Cyprus	Famagusta Bay	Distribution	Ecology		1	35.1417	33.925	37	55
29	M29*	Mediterranean	Lipkin, 1975a	1975a	Cyprus	Famagusta Bay	Distribution	Ecology		1	35.1417	33.925	18	27
29	M29*	Mediterranean	Lipkin, 1975a	1975a	Cyprus	Famagusta Bay	Distribution	Ecology		1	35.1417	33.925	37	64
29	M29*	Mediterranean	Lipkin, 1975a	1975a	Cyprus	Famagusta Bay	Distribution	Ecology		1	35.1417	33.925	137	147
29	M29*	Mediterranean	Lipkin, 1975a	1975a	Cyprus	South of Limassol	Distribution	Ecology		1	34.664	33.06	37	37
29	M29*	Mediterranean	Lipkin, 1975a	1975a	Greece	Mandrikon Harbour, Rhodes	Distribution	Ecology		1	36.2917	27.8476
29	M29*	Mediterranean	Lipkin, 1975a	1975a	Greece	Zephyros Bay, Rhodes	Distribution	Ecology		1	36.4274	28.2355	40	45
30	M30*	Mediterranean	Lipkin, 1975b	1975b	Cyprus	Akrotiri Bay	Distribution	Ecology	Phenology	1	34.6585	33.1139	40	45					Muddy
30	M30*	Mediterranean	Lipkin, 1975b	1975b	Cyprus	Famagusta Bay	Distribution	Ecology	Phenology	1	35.125	33.9556
30	M30*	Mediterranean	Lipkin, 1975b	1975b	Cyprus	Khrysokhou bay	Distribution	Ecology	Phenology	1	35.0835	32.3776	45	45					Muddy
30	M30*	Mediterranean	Lipkin, 1975b	1975b	Cyprus	Off Petounda Point	Distribution	Ecology	Phenology	1	34.7649	33.4984	13	18					Muddy
30	M30*	Mediterranean	Lanfranco, 1970 (reviewed by Lipkin, 1975b)	1975b	Malta	Marsaxlokk (Marsa Scirrocco)	Distribution			1	35.8258	14.5461
30	M30*	Mediterranean	Issel, 1928 (reviewed by Lipkin 1975b)	1975b	Greece	Rhodes, Lindos, Paulus Bay	Distribution	Range expansion		0	36.0869	28.0883	2	2
30	M30*	Mediterranean	Täckholm et al., 1941 (reviewed by Lipkin, 1975b)	1975b	Egypt	Bur Sa'id	Distribution	Ecology	Phenology	1	31.257	32.4138
30	M30*	Mediterranean	Aleem, 1962 (reviewed by Lipkin, 1975b)	1975b	Egypt	Marsa Matrukh harbour	Distribution	Ecology	Phenology	1	31.374	27.2355	2	8					Sandy
30	M30*	Mediterranean	Politis, 1926 (reviewed by Lipkin, 1975b)	1975b	Greece	Aegina Island, Saronic Gulf	Distribution	Ecology	Phenology	1	37.728	23.4891
30	M30*	Mediterranean	Den Hartog, 1970 (reviewed by Lipkin, 1975b)	1975b	Greece	Azomato Bay, Rhodes	Distribution	Ecology	Phenology	1	36.397453 N	22.487056 E	20	20					Sandy and Muddy															female - male flower
30	M30*	Mediterranean	Peres and Picard, 1958 (reviewed by Lipkin, 1975b)	1975b	Greece	Dia Islet, Crete	Distribution	Ecology	Phenology	1	35.4453	25.2182							sediment on rock
30	M30*	Mediterranean	Peres and Picard, 1958 (reviewed by Lipkin, 1975b)	1975b	Greece	East of Kaloi Limenes, Crete	Distribution	Ecology	Phenology	1	34.9302	24.8025	5	6					Sandy
30	M30*	Mediterranean	Politis, 1926 (reviewed by Lipkin, 1975b)	1975b	Greece	Mainland Greece, Faliron	Distribution	Ecology	Phenology	1	37.9355	23.6767	8	12					Sandy															only female
30	M30*	Mediterranean	Lipkin, 1975b	1975b	Greece	Khoclacos, Rhodes	Distribution	Ecology	Phenology	1	nd	nd	0.2	1					Sandy										Great quantities							plant to depend on artificial media (boats) for its dispersal.
30	M30*	Mediterranean	Politis, 1926 (reviewed by Lipkin, 1975b)	1975b	Greece	Island of Kithnos, Cyclades group	Distribution	Ecology	Phenology	1	37.3911	24.4194
30	M30*	Mediterranean	Forti, 1927 (reviewed by Lipin, 1975b)	1975b	Greece	Lindhos, Rhodes	Distribution	Ecology	Phenology	1	36.0896	28.0913
30	M30*	Mediterranean	Lipkin, 1975b	1975b	Greece	Mandrikon Harbour, Rhodes	Distribution	Ecology	Phenology	1	36.2917	27.8476
30	M30*	Mediterranean	Diannelidis, 1963 (reviewed by Lipkin, 1975b)	1975b	Greece	Gulf of Pagassai (Pagasitikos Kolpos)	Distribution	Ecology	Phenology	1	39.226	22.9662	8	12
30	M30*	Mediterranean	Politis, 1926 (reviewed by Lipkin, 1975b)	1975b	Greece	Mainland Greece, Piraevs	Distribution	Ecology	Phenology	1	37.9291	23.6562	8	12					Sandy															only female
30	M30*	Mediterranean	Den Hartog, 1970 (reviewed by Lipkin, 1975b)	1975b	Greece	island of Sámos, Sporades {Dodecanese} group	Distribution	Ecology	Phenology	1	37.7052	20.9817	45	45					Muddy
30	M30*	Mediterranean	Lipkin, 1975b	1975b	Greece	Southeast of Vasilikos	Distribution	Ecology	Phenology	1	34.9246	24.8066							Muddy
30	M30*	Mediterranean	Peres and Picard, 1958 (reviewed by Lipkin, 1975b)	1975b	Greece	St. Paul Islet, Crete	Distribution	Ecology	Phenology	1	37.4305	24.911							Muddy sand										Abundant
30	M30*	Mediterranean	Politis, 1926 (reviewed by Lipkin, 1975b)	1975b	Greece	Syros Harbour, island of Syros, Cyclades group	Distribution	Ecology	Phenology	1	37.6091	25.1551
30	M30*	Mediterranean	Fritsch, 1895 (reviewed by Lipkin, 1975b)	1975b	Greece	Mandrikon Harbour, Rhodes	Distribution	Ecology		1	36.4478	28.2417	0																							Nemetz found a detached fragment floating on the surface
30	M30*	Mediterranean	Issel, 1928 (reviewed by Lipkin 1975b)	1975b	Greece	Arka Kofibournou (Cape Cum Burnu), north of the city of Rhodes	Distribution	Survey											Sandy depression
30	M30*	Mediterranean	Lipkin, 1975b	1975b	Lebanon	Off Sidon, Saida	Distribution	Ecology	Phenology	1	33.5707	35.3734	0	10					Sandy
30	M30*	Mediterranean	Lipkin, 1975b	1975b	Turkey	Ammokhostou Kolpos, Cyprus	Distribution	Ecology	Phenology	1	34.9252	33.5128	18	18					Muddy																	H. stipulacea is euryhaline and easily stands the hypersalinity in the Suez Canal, where it is very abundant.
30	M30*	Mediterranean	Lipkin, 1975b	1975b	Greece	Zephyros Bay, Rhodes	Distribution	Ecology	Phenology	1	36.4274	28.2355	40	45															Great quantities
31	M31*	Mediterranean	Malea & Haritonidis, 1989	1989	Greece	Gulf of Antikyra	Links with humans	Pollution	Trace elements	1	38.3728	22.6481	1	15
32	M32*	Mediterranean	Malea, 1994a	1994a	Greece	Gulf of Antikyra	Other	Bioprospecting	Trace elements	1	38.3728	22.6481	1.5	5
33	M33*	Mediterranean	Malea, 1994b	1994b	Greece	Gulf of Antikyra	Links with humans	Pollution	Trace elements	1	38.3728	22.6481	0.5	15	11.0 (december)	24.0 (july)	36	36
33	M33*	Mediterranean	Malea, 1994b	1994b	Greece	Gulf of Antikyra	Links with humans	Pollution	Trace elements	1	38.3728	22.6481	0.5	15	11.0 (december)	24.0 (july)	36	36																		There was a positive correlation between Cu, Zn, Cd and Na concentrations in the above-ground and below-ground plant parts.
33	M33*	Mediterranean	Malea, 1994b	1994b	Greece	Gulf of Antikyra	Links with humans	Pollution	Trace elements	1	38.3728	22.6481	0.5	15	11.0 (december)	24.0 (july)	36	36																		The leaves of H. stipulacea accumulated higher Zn, Na, K and Mg concentrations than the stems, roots and rhizoids.
33	M33*	Mediterranean	Malea, 1994b	1994b	Greece	Gulf of Antikyra	Links with humans	Pollution	Trace elements	1	38.3728	22.6481	0.5	15	11.0 (december)	24.0 (july)	36	36																		maximum concentrations in summer and autumn and minimum concentrations in winter and spring was evident in Fe, Zn and K
33	M33*	Mediterranean	Malea, 1994b	1994b	Greece	Gulf of Antikyra	Links with humans	Pollution	Trace elements	1	38.3728	22.6481	0.5	15	11.0 (december)	24.0 (july)	36	36																		uptake higher concentrations Na, K, Ca, Mg, Fe, lower Cd
34	M34*	Mediterranean	Malea, 1995	1995	Greece	Gulf of Antikyra	Other	Bioprospecting	Trace elements	1	38.3728	22.6481	1.5	5
35	M35	Mediterranean	Nguyen et al., 2018	2018	Cyprus	Dream Café, Limassol	Ecology	Sexual reproduction	Fruits & Flowers	3	34.7056	33.1233	2	4					Sandy
35	M35	Mediterranean	Nguyen et al., 2018	2018	Cyprus	Limassol Port, Limassol	Ecology	Sexual reproduction	Fruits & Flowers	3	34.6428	33.0178	6	8
36	M36	Mediterranean	Meric et al., 2008	2008	Turkey	Kas	Ecology	Habitat		3	36.0998	29.4021	8	18
36	M36	Mediterranean	Meric et al., 2008	2008	Turkey	Kekova	Ecology	Habitat		3	36.1037	29.4609	8	18
37	M37*	Mediterranean	Mollo et al.,2008	2008	Greece	Porto Germeno coasts, Gulf of Corinth	Ecology	Bioprospecting	Chemoecology	1	38.1537	23.2212	5	10
38	M38	Mediterranean	Procaccini et al.,1999a	1999a	Italy	Oliveri-Tindari, Messina, Sicily	Physiology	Morphometrics & Genetic studies		2	38.15	15.4333	2	2								6.38 - 8.43	0.83 - 10.1	18.7 - 29.1			25345 ± 4324							no observation
38	M38	Mediterranean	Procaccini et al.,1999a	1999a	Italy	Vulcano Island, Sicily	Physiology	Morphometrics & Genetic studies		2	38.4	14.7333	5	25								49.6	6.5	1.41			15170 ± 2878							17.5 ± 4.8 male flower/m2		About genetic, The shallow Vulcano stand was found to be closer to the shallow Oliveri-Tindari meadow than to the deeper stand from Vulcano.
39	M39*	Mediterranean	Rindi et al.,1999	1999	Italy	Vulcano Island, Sicily	Ecology	Habitat		1	38.4156	14.9633	5	25					Sandy																	Osservazioni su una prateria di Halophila stipulacea (Forssk) Aschers. (Hydrocharitaceae) nel mar Tirreno Meridionale
40	M40*	Mediterranean	Ruggiero & Procaccini, 2004	2004	Greece	Rhodes	Other	Genetic studies		1	36.432	28.219
40	M40*	Mediterranean	Ruggiero & Procaccini, 2004	2004	Italy	Vulcano Island, Sicily	Other	Genetic studies		1	38.4156	14.9633
41	M41	Mediterranean	Sghaier et al., 2011	2011	Libya	Al-wahesh Lagoon	Distribution	Morphometrics		3	32.3072	23.1189	0.5	1					Sandy and Muddy
41	M41	Mediterranean	Sghaier et al., 2011	2011	Libya	Tobrouk Bay	Distribution	Morphometrics		3	32.0625	23.9922	2	5					Sandy			47	55				476 ± 83	28.4
41	M41	Mediterranean	Sghaier et al., 2011	2011	Tunisia	Marina Cap Monastir	Distribution	Morphometrics		3	35.7789	10.8353	0.5	2					Sandy and Muddy			58.2 ± 4.3	7.1 ± 0.7	13.3 ± 2			9900 ± 3509	2000								Moreover, almost all the recorded occurrences of H. stipulacea in the southern Mediterranean are in relatively limited areas near or within harbours or marinas. The areas colonised by this species may have been previously occupied either by “ bare ” sediment or by Other seagrasses, as in the case of Al-wahesh Lagoon (Libya) where H. stipulacea grew over a dead matte of Posidonia oceanica or mixed…
41	M41	Mediterranean	Sghaier et al., 2011	2011	Tunisia	Kerkennah Island - Allama	Distribution	Morphometrics		3	34.6128	11.0478	0	2
41	M41	Mediterranean	UNEP /MAP-RAC/SPA 2003a,b (reviewed by Sghaier et al., 2011)	2011	Syria	Ras Al Bassit	Distribution	Survey		2	35.8555	35.8021
42	M42	Mediterranean	Sghaier et al., 2016	2016	Tunisia	Kerkennah Island - Allama	Distribution	Survey		3	34.6093	11.05	0	1
42	M42	Mediterranean	Sghaier et al., 2016	2016	Tunisia	Kneiss Island Jaboussa	Distribution	Survey		3	34.345	10.2157	1	1
42	M42	Mediterranean	Sghaier et al., 2016	2016	Tunisia	Kerkennah Island - Al Attaya	Distribution	Survey		3	34.7342	11.3044	1.5	1.5
42	M42	Mediterranean	Sghaier et al., 2016	2016	Tunisia	Marina Cap Monastir	Distribution	Survey		3	35.7719	10.8454	0.5	2
43	M43*	Mediterranean	Turkozan, 2000	2000	Turkey	Fethiye Beach	Ecology	Habitat		1	36.6675	29.0984
44	M44*	Mediterranean	Van der Velde & Den Hartog, 1992	1992	Greece	Kefallinia and Ithaki	Distribution	Range expansion		1	38.3895	20.6354	1	3
45	M45	Mediterranean	Varela-Alvarez et al.,2011	2011	Turkey	Gümüldür, Izmir	Other	Molecular studies		3	38.0442	27.015	23	23														250						no observation
46	M46	Mediterranean	Waycott et al.,2002	2002	Italy	Sicily	Other	Molecular studies		1	37.6	14.0154
47	M47	Mediterranean	Apostolaki et al., 2019	2019	Greece	Chanta, Crete Island	Ecology	Carbon metabolism		3	35.5653	24.08	16	16													11956 ± 1476
47	M47	Mediterranean	Apostolaki et al., 2019	2019	Greece	Sitia, Crete Island	Ecology	Carbon metabolism		3	35.2072	26.005	10	10													13148 ± 2112
47	M47	Mediterranean	Apostolaki et al., 2019	2019	Greece	Souda, Crete Island	Ecology	Carbon metabolism		3	35.4714	24.1483	5	5													3132 ± 1013
48	M48	Mediterranean	Lakkis & Novel-Lakkis, 2007	2007	Lebanon	Levantine Basin	Distribution	Survey		2	34.5833	35.5
49	M49*	Mediterranean	Gargiulo et al.,2018	2018	Italy	Riposto, Sicily	Other	Genetic studies		1	37.7358	15.2077	3	9
49	M49*	Mediterranean	Gargiulo et al.,2018	2018	Italy	Straits of Messina, Sicily	Other	Genetic studies		1	38.1936	15.5613	3	9
49	M49*	Mediterranean	Gargiulo et al.,2018	2018	Italy	Vulcano Island, Sicily	Other	Genetic studies		1	38.4156	14.9633	3	9
50	M50	Mediterranean	Gambi et al., 2018	2018	Italy	Palinuro harbour	Distribution	Range expansion		3	40.028	15.2789	1.5	4													6230±1644
51	M51	Mediterranean	Acunto et al., 1997	1997	Italy	Levante Bay, Vulcano Island, Sicily	Ecology	Habitat	Associated animal community	3	38.4139	14.9653	5	25								30.3-54.1	4.8-7.0				2358-5521
52	M52*	Mediterranean	Alongi et al., 1993	1993	Italy	Porto di Catania, Sicily	Ecology			1	37.5015	15.1007
53	M53*	Mediterranean	Alpinar et al., 1987	1987	Turkey	nd	Distribution			1	nd	nd
54	M54*	Mediterranean	Kashta & Pizzuto, 1995	1995	Albania	Gulf of Vlora	Distribution			1	40.4416	19.4035	2	15
55	M55*	Mediterranean	Procaccini et al.,1999b	1999b	Italy	Taormina, Sicily	Other	Phylogenetics		0	37.8465	15.2871																						only male		Chloroplast tRNALeu (UAA) intron sequences provide phylogenetic resolution of seagrass relationships
56	M56	Mediterranean	Sghaier et al., 2014	2014	Tunisia	Marina Cap Monastir	Ecology	Range expansion	Competition	3	35.7789	10.8353	35.7789	10.8353	1
